# Supplementary material
Source: HighWire-hosted journal article supplement (https://bmjopen.bmj.com/content/11/12/e051424)

**SUPPLEMENTAL, METHOD | Logistic prediction model**

The logistic prediction model for predicting fulfilment of all-or-none was defined as:

$$\text{Log}(\text{probability}/(1-\text{probability}))_i = \alpha + \beta_1 \text{ (if male)}_i + \beta_{2,1} \text{ (if low comorbidity)}_i + \beta_{2,2} \text{ (if moderate comorbidity)}_i + \beta_{2,3} \text{ (if moderate high comorbidity)}_i + \beta_{3,1} \text{ (if displaced medial fracture)}_i + \beta_{3,2} \text{ (if per- or subtrochanteric fracture)}_i + \beta_{3,3} \text{ (if missing)}_i + \beta_{4,1} \text{ (if more than elementary school, but no university degree)}_i + \beta_{4,2} \text{ (if university degree)}_i + \beta_{4,3} \text{ (if missing)}_i + \beta_{5,1} \text{ (if medium family mean income)}_i + \beta_{5,2} \text{ (if high family mean income)}_i + \beta_6 \text{ (if immigrant)}_i + \beta_7 \text{ (if living alone)}_i + \beta_{8,1} \text{ (if employed)}_i + \beta_{8,2} \text{ (if missing)}_i + \beta_9 \text{ (if living at a nursing home)}_i + \beta_{10} \text{ (if living in a peripheral municipality)}_i + \text{spline}(\text{Age})_i + e_i$$

where  $i$  is the value for that individual, and  $e_i$  is the individual random error. The effect of age was modelled by a restricted cubic spline with 7 knots.

**SUPPLEMENTAL TABLE 1 | Patient characteristics for best-off and worst-off patients from 2007 to 2016**

|                                                    | Calendar year |            |             |            |            |            |            |            |            |            |
|----------------------------------------------------|---------------|------------|-------------|------------|------------|------------|------------|------------|------------|------------|
|                                                    | 2007          | 2008       | 2009        | 2010       | 2011       | 2012       | 2013       | 2014       | 2015       | 2016       |
| <b>BEST-OFF PATIENTS</b>                           |               |            |             |            |            |            |            |            |            |            |
| <b>Patients (N)</b>                                | <b>507</b>    | <b>648</b> | <b>628</b>  | <b>546</b> | <b>633</b> | <b>616</b> | <b>617</b> | <b>555</b> | <b>646</b> | <b>637</b> |
| <b>Age group, % (n)</b>                            |               |            |             |            |            |            |            |            |            |            |
| 65-74 years                                        | 49.7 (252)    | 27.8 (180) | 6.2 (39)    | 30.2 (165) | 19.1 (121) | 21.4 (132) | 41.3 (255) | 29.4 (163) | 31.6 (204) | 23.4 (149) |
| 75-84 years                                        | 45.2 (229)    | 56.8 (368) | 63.4 (398)  | 38.8 (212) | 54.2 (343) | 37.2 (229) | 33.2 (205) | 51.5 (286) | 44.7 (289) | 36.6 (233) |
| ≥85 years                                          | 5.1 (26)      | 15.4 (100) | 30.4 (191)  | 31.0 (169) | 26.7 (169) | 41.4 (255) | 25.5 (157) | 19.1 (106) | 23.7 (153) | 40.0 (255) |
| <b>Sex, % (n)</b>                                  |               |            |             |            |            |            |            |            |            |            |
| Male                                               | 7.1 (36)      | 4.3 (28)   | 0.0 (0)     | 28.8 (157) | 26.4 (167) | 22.7 (140) | 20.4 (126) | 29.6 (164) | 15.6 (101) | 8.0 (51)   |
| Female                                             | 92.9 (471)    | 95.7 (620) | 100.0 (628) | 71.3 (389) | 73.6 (466) | 77.3 (476) | 79.6 (491) | 70.5 (391) | 84.4 (545) | 92.0 (586) |
| <b>Cohabitant status, % (n)</b>                    |               |            |             |            |            |            |            |            |            |            |
| Single                                             | 41.2 (209)    | 13.7 (89)  | 74.5 (468)  | 57.3 (313) | 55.0 (348) | 65.8 (405) | 70.7 (436) | 55.1 (306) | 54.5 (352) | 63.1 (402) |
| Living together                                    | 58.8 (298)    | 86.3 (559) | 25.5 (160)  | 42.7 (233) | 45.0 (285) | 34.3 (211) | 29.3 (181) | 44.7 (249) | 45.5 (294) | 36.9 (235) |
| <b>Charlson Comorbidity index % (n)</b>            |               |            |             |            |            |            |            |            |            |            |
| No                                                 | 4.7 (24)      | 27.3 (177) | 7.0 (44)    | 32.2 (176) | 38.9 (246) | 34.7 (214) | 62.1 (383) | 56.4 (313) | 55.9 (361) | 71.4 (455) |
| Low                                                | 24.9 (126)    | 33.5 (217) | 0.0 (0)     | 35.7 (195) | 37.1 (235) | 21.4 (132) | 20.6 (127) | 9.0 (50)   | 22.5 (145) | 10.8 (69)  |
| Moderate                                           | 29.4 (149)    | 3.4 (22)   | 0.0 (0)     | 13.2 (72)  | 11.4 (72)  | 14.3 (88)  | 6.8 (42)   | 11.5 (64)  | 13.9 (90)  | 11.5 (73)  |
| High                                               | 41.0 (208)    | 35.8 (232) | 93.0 (584)  | 18.9 (103) | 12.6 (80)  | 29.6 (182) | 10.5 (65)  | 23.1 (128) | 7.7 (50)   | 6.3 (40)   |
| <b>Level of education, % (n)</b>                   |               |            |             |            |            |            |            |            |            |            |
| Low Primary school (7-10 years)                    | 48.5 (246)    | 80.1 (519) | 67.7 (425)  | 9.7 (53)   | 39.5 (250) | 76.1 (469) | 75.4 (465) | 37.5 (208) | 80.8 (522) | 68.8 (438) |
| More than primary School, but no university degree | 41.6 (211)    | 12.2 (79)  | 28.0 (176)  | 80.6 (440) | 30.5 (193) | 10.1 (62)  | 11.0 (68)  | 35.9 (199) | 7.7 (50)   | 23.1 (147) |
| Obtained university degree                         | 1.6 (8)       | 1.1 (7)    | *           | 7.9 (43)   | 17.5 (111) | 7.6 (47)   | 6.0 (37)   | 22.2 (123) | 2.6 (17)   | 1.3 (8)    |
| Missing                                            | 8.3 (42)      | 6.6 (43)   | *           | 1.8 (10)   | 12.5 (79)  | 6.2 (38)   | 7.6 (47)   | 4.5 (25)   | 8.8 (57)   | 6.9 (44)   |

|                                      | Calendar year |             |             |            |            |             |            |             |            |             |
|--------------------------------------|---------------|-------------|-------------|------------|------------|-------------|------------|-------------|------------|-------------|
|                                      | 2007          | 2008        | 2009        | 2010       | 2011       | 2012        | 2013       | 2014        | 2015       | 2016        |
| <b>Family mean income, % (n)</b>     |               |             |             |            |            |             |            |             |            |             |
| Low                                  | 19.3 (98)     | 23.6 (153)  | 64.8 (407)  | 27.1 (148) | 30.8 (195) | 42.9 (264)  | 26.1 (161) | 20.4 (113)  | 28.0 (181) | 19.9 (127)  |
| Medium                               | 56.6 (287)    | 51.7 (335)  | 13.9 (87)   | 18.5 (101) | 13.7 (87)  | 29.6 (182)  | 49.1 (303) | 19.1 (106)  | 39.3 (254) | 42.1 (268)  |
| High                                 | 24.1 (122)    | 24.7 (160)  | 21.3 (134)  | 54.4 (297) | 55.5 (351) | 27.6 (170)  | 24.8 (153) | 60.5 (336)  | 32.7 (211) | 38.0 (242)  |
| <b>Migrant status, % (n)</b>         |               |             |             |            |            |             |            |             |            |             |
| Native                               | *             | 100.0 (648) | 100.0 (628) | *          | 85.5 (541) | 100.0 (616) | *          | *           | 94.4 (610) | 100.0 (637) |
| Immigrant                            | *             | 0.0 (0)     | 0.0 (0)     | *          | 14.5 (92)  | 0.0 (0)     | *          | *           | 5.6 (36)   | 0.0 (0)     |
| <b>Fracture type, % (n)</b>          |               |             |             |            |            |             |            |             |            |             |
| Non-displaced medial fracture        | 0.00 (0)      | 5.3 (34)    | 0.0 (0)     | 29.1 (159) | 51.7 (327) | 10.6 (65)   | 16.4 (101) | 44.0 (244)  | 15.6 (101) | 4.4 (28)    |
| Displaced medial fracture            | 62.1 (315)    | 69.6 (451)  | 45.9 (288)  | 46.5 (254) | 29.4 (186) | 52.1 (321)  | 57.4 (354) | 33.5 (186)  | 39.5 (255) | 85.4 (544)  |
| Per- or subtrochanteric fracture     | 37.9 (192)    | 25.2 (163)  | 54.1 (340)  | 24.4 (133) | *          | 37.3 (230)  | 26.3 (162) | 22.5 (125)  | 44.9 (290) | 10.2 (65)   |
| Missing                              | 0.0 (0)       | 0.0 (0)     | 0.0 (0)     | 0.0 (0)    | *          | 0.0 (0)     | 0.0 (0)    | 0.0 (0)     | 0.0 (0)    | 0.0 (0)     |
| <b>Employment status, % (n)</b>      |               |             |             |            |            |             |            |             |            |             |
| Employed                             | 0.0 (0)       | 13.7 (89)   | 1.4 (9)     | 8.2 (45)   | 8.9 (56)   | 4.6 (28)    | *          | 18.7 (104)  | 5.3 (34)   | 1.9 (12)    |
| Retired                              | 0.0 (0)       | 86.3 (559)  | 98.6 (619)  | 91.8 (501) | 91.2 (577) | 95.5 (588)  | *          | 81.3 (451)  | 94.7 (612) | 98.1 (625)  |
| Missing                              | 100.0 (507)   | 0.0 (0)     | 0.0 (0)     | 0.0 (0)    | 0.0 (0)    | 0.0 (0)     | 0.0 (0)    | 0.0 (0)     | 0.0 (0)    | 0.0 (0)     |
| <b>Nursing home residence, % (n)</b> |               |             |             |            |            |             |            |             |            |             |
| Living in own home                   | 100.0 (507)   | 100.0 (648) | 100.0 (628) | 98.0 (535) | 94.2 (596) | 93.3 (575)  | 98.7 (609) | 100.0 (555) | 94.0 (607) | 91.5 (583)  |
| Nursing home residence               | 0.0 (0)       | 0.0 (0)     | 0.0 (0)     | 2.0 (11)   | 5.9 (37)   | 6.7 (41)    | 1.3 (8)    | 0.0 (0)     | 6.0 (39)   | 8.5 (54)    |
| <b>Type of municipality, % (n)</b>   |               |             |             |            |            |             |            |             |            |             |
| Non-rural municipality               | 98.6 (500)    | 83.0 (538)  | 100.0 (628) | 92.3 (504) | 75.5 (478) | 12.3 (76)   | 60.1 (371) | *           | 42.4 (274) | 50.1 (319)  |
| Peripheral municipality              | 1.4 (7)       | 17.0 (110)  | 0.0 (0)     | 7.7 (42)   | 24.5 (155) | 87.7 (540)  | 39.9 (246) | *           | 57.6 (372) | 49.9 (318)  |

|                                                    | Calendar year |            |            |             |             |             |            |            |            |            |
|----------------------------------------------------|---------------|------------|------------|-------------|-------------|-------------|------------|------------|------------|------------|
|                                                    | 2007          | 2008       | 2009       | 2010        | 2011        | 2012        | 2013       | 2014       | 2015       | 2016       |
| <b>WORST-OFF PATIENTS</b>                          |               |            |            |             |             |             |            |            |            |            |
| <b>Patients (N)</b>                                | 507           | 648        | 628        | 546         | 633         | 616         | 617        | 555        | 646        | 637        |
| <b>Age group, % (n)</b>                            |               |            |            |             |             |             |            |            |            |            |
| 65-74 years                                        | 6.7 (34)      | 13.1 (85)  | 11.6 (73)  | 16.1 (88)   | 29.9 (189)  | 17.2 (106)  | 12.5 (77)  | 13.2 (73)  | 18.3 (118) | 22.1 (141) |
| 75-84 years                                        | 44.8 (227)    | 25.5 (165) | 22.0 (138) | 39.4 (215)  | 18.3 (116)  | 37.0 (228)  | 38.4 (237) | 22.3 (124) | 33.9 (219) | 34.5 (220) |
| ≥85 years                                          | 48.5 (246)    | 61.4 (398) | 66.4 (417) | 44.5 (243)  | 51.8 (328)  | 45.8 (282)  | 49.1 (303) | 64.5 (358) | 47.8 (309) | 43.3 (276) |
| <b>Sex, % (n)</b>                                  |               |            |            |             |             |             |            |            |            |            |
| Male                                               | 51.7 (262)    | 69.0 (447) | 56.5 (355) | 24.4 (133)  | 34.7 (220)  | 29.8 (184)  | 34.9 (215) | 24.3 (135) | 38.9 (251) | 31.2 (199) |
| Female                                             | 48.3 (245)    | 31.0 (201) | 43.5 (273) | 75.6 (413)  | 65.2 (413)  | 70.1 (432)  | 65.2 (402) | 75.7 (420) | 61.2 (395) | 68.8 (438) |
| <b>Cohabitant status, % (n)</b>                    |               |            |            |             |             |             |            |            |            |            |
| Single                                             | 62.9 (319)    | 81.9 (531) | 74.2 (466) | 66.3 (362)  | 70.8 (448)  | 63.5 (391)  | 63.5 (392) | 71.2 (395) | 61.3 (396) | 61.5 (392) |
| Living together                                    | 37.1 (188)    | 18.1 (117) | 25.8 (162) | 33.7 (184)  | 29.2 (185)  | 36.5 (225)  | 36.5 (225) | 28.8 (160) | 38.7 (250) | 38.5 (245) |
| <b>Charlson comorbidity index, % (n)</b>           |               |            |            |             |             |             |            |            |            |            |
| No                                                 | 21.7 (110)    | 13.3 (86)  | 11.3 (71)  | 12.3 (67)   | *           | 12.0 (74)   | 8.1 (50)   | 7.0 (39)   | 16.7 (108) | 16.6 (106) |
| Low                                                | 19.1 (97)     | 14.4 (93)  | 34.7 (218) | 20.9 (114)  | *           | 21.8 (134)  | 21.2 (131) | 35.7 (198) | 18.9 (122) | 23.1 (147) |
| Moderate                                           | 15.0 (76)     | 42.3 (274) | 37.9 (238) | 25.6 (140)  | 20.2 (128)  | 23.9 (147)  | 24.6 (152) | 21.1 (117) | 16.4 (106) | 23.9 (152) |
| High                                               | 44.2 (224)    | 30.1 (195) | 16.1 (101) | 41.2 (225)  | 77.1 (488)  | 42.4 (261)  | 46.0 (284) | 36.2 (201) | 48.0 (310) | 36.4 (232) |
| <b>Level of education, % (n)</b>                   |               |            |            |             |             |             |            |            |            |            |
| Low Primary school (7-10 year)                     | 48.5 (246)    | 12.8 (83)  | 23.7 (149) | 55.0 (300)  | 63.8 (404)  | 35.4 (218)  | 34.7 (214) | 62.9 (349) | 41.0 (265) | 44.1 (281) |
| More than primary School, but no university degree | 11.8 (60)     | 21.5 (139) | 14.3 (90)  | 11.2 (61)   | 16.4 (104)  | 30.4 (187)  | 33.7 (208) | 16.4 (91)  | 35.5 (229) | 34.9 (222) |
| Obtained university Degree                         | 20.1 (102)    | 14.2 (92)  | 5.1 (32)   | 9.5 (52)    | 6.0 (38)    | 9.9 (61)    | 14.4 (89)  | 4.3 (24)   | 18.6 (120) | 14.4 (92)  |
| Missing                                            | 19.5 (99)     | 51.5 (334) | 56.9 (357) | 24.4 (133)  | 13.7 (87)   | 24.4 (150)  | 17.2 (106) | 16.4 (91)  | 5.0 (32)   | 6.6 (42)   |
| <b>Family mean income, % (n)</b>                   |               |            |            |             |             |             |            |            |            |            |
| Low                                                | 61.5 (312)    | 53.2 (345) | 48.1 (302) | 44.51 (243) | 31.60 (200) | 29.71 (183) | 22.5 (139) | 22.0 (122) | 13.3 (86)  | 12.4 (79)  |
| Medium                                             | 14.2 (72)     | 17.3 (112) | 34.7 (218) | 29.49 (161) | 54.98 (348) | 32.79 (202) | 29.2 (180) | 49.7 (276) | 31.1 (201) | 36.4 (232) |
| High                                               | 24.3 (123)    | 29.5 (191) | 17.2 (108) | 26.01 (142) | 13.43 (85)  | 37.50 (231) | 48.3 (298) | 28.3 (157) | 55.6 (359) | 51.2 (326) |

|                                      | Calendar year |             |            |            |             |            |            |            |            |            |
|--------------------------------------|---------------|-------------|------------|------------|-------------|------------|------------|------------|------------|------------|
|                                      | 2007          | 2008        | 2009       | 2010       | 2011        | 2012       | 2013       | 2014       | 2015       | 2016       |
| <b>Migrant status, % (n)</b>         |               |             |            |            |             |            |            |            |            |            |
| Native                               | 89.2 (452)    | 79.2 (513)  | 94.6 (594) | 96.0 (524) | 100.0 (633) | 81.2 (500) | 87.2 (538) | 91.0 (505) | 98.5 (636) | 95.1 (606) |
| Immigrant                            | 10.9 (55)     | 20.8 (135)  | 5.4 (34)   | 4.0 (22)   | 0.0 (0)     | 18.8 (116) | 12.8 (79)  | 9.0 (50)   | 1.6 (10)   | 4.9 (31)   |
| <b>Fracture type, % (n)</b>          |               |             |            |            |             |            |            |            |            |            |
| Non-displaced medial Fracture        | 54.2 (275)    | 8.5 (55)    | 21.7 (136) | 0.0 (0)    | 0.0 (0)     | *          | *          | *          | 0.0 (0)    | 0.0 (0)    |
| Displaced medial fracture            | 19.3 (98)     | 24.9 (161)  | 32.8 (206) | *          | 16.0 (101)  | *          | *          | *          | 7.7 (50)   | *          |
| Per- or subtrochanteric Fracture     | 26.4 (134)    | 66.7 (432)  | 45.5 (286) | *          | 41.6 (263)  | 23.9 (147) | 26.6 (164) | 24.5 (136) | 8.8 (57)   | *          |
| Missing                              | 0.0 (0)       | 0.0 (0)     | 0.0 (0)    | 97.3 (531) | 42.5 (269)  | 70.0 (431) | 64.7 (399) | 56.2 (312) | 83.4 (539) | *          |
| <b>Employment status, % (n)</b>      |               |             |            |            |             |            |            |            |            |            |
| Employed                             | 0.0 (0)       | *           | 1.3 (8)    | 2.8 (15)   | *           | 2.4 (15)   | 6.6 (41)   | *          | 2.3 (15)   | 3.3 (21)   |
| Retired                              | 0.0 (0)       | *           | 98.7 (620) | 97.3 (531) | *           | 97.6 (601) | 93.4 (576) | *          | 97.7 (631) | 96.7 (616) |
| Missing                              | 100.0 (507)   | 0.0 (0)     | 0.0 (0)    | 0.0 (0)    | 0.0 (0)     | 0.0 (0)    | 0.0 (0)    | 0.0 (0)    | 0.0 (0)    | 0.0 (0)    |
| <b>Nursing home residence, % (n)</b> |               |             |            |            |             |            |            |            |            |            |
| Non-nursing home                     | 100.0 (507)   | 100.0 (648) | 31.1 (195) | 81.1 (443) | 70.9 (449)  | 73.4 (452) | 71.0 (438) | 62.9 (349) | 82.8 (535) | 86.5 (551) |
| Nursing home                         | 0.0 (0)       | 0.0 (0)     | 69.0 (433) | 18.9 (103) | 29.1 (184)  | 26.6 (164) | 29.0 (179) | 37.1 (206) | 17.2 (111) | 13.5 (86)  |
| <b>Type of municipality, % (n)</b>   |               |             |            |            |             |            |            |            |            |            |
| Non-rural municipality               | 65.3 (331)    | 90.6 (587)  | 76.1 (478) | 92.9 (507) | 94.9 (601)  | 94.3 (581) | 92.2 (569) | 55.3 (307) | 95.8 (619) | 95.9 (611) |
| Peripheral municipality              | 34.7 (176)    | 9.4 (61)    | 23.9 (150) | 7.1 (39)   | 5.1 (32)    | 5.7 (35)   | 7.8 (48)   | 44.7 (248) | 4.2 (27)   | 4.1 (26)   |

\* = values below 5

**SUPPLEMENTAL TABLE 2 | The proportion of best-off- and worst-off patients, who fulfilled the all-or-none and the individual process performance measures as well as the difference in fulfilment between best-off and worst-off patients, by calendar year**

|                                                                        | Calendar year   |                 |                  |                  |                  |                  |                  |                  |                  |                  |
|------------------------------------------------------------------------|-----------------|-----------------|------------------|------------------|------------------|------------------|------------------|------------------|------------------|------------------|
|                                                                        | 2007            | 2008            | 2009             | 2010             | 2011             | 2012             | 2013             | 2014             | 2015             | 2016             |
| <b>ALL-OR-NONE</b>                                                     |                 |                 |                  |                  |                  |                  |                  |                  |                  |                  |
| Best-off patients                                                      | 63.5 (507)      | 67.8 (648)      | 71.2 (628)       | 41.6 (546)       | 59.7 (633)       | 70.9 (616)       | 68.4 (617)       | 67.2 (555)       | 56.7 (646)       | 34.1 (637)       |
| Worst-off patients                                                     | 51.9 (507)      | 54.5 (648)      | 55.7 (628)       | 19.2 (546)       | 39.5 (633)       | 43.7 (616)       | 47.5 (617)       | 41.3 (555)       | 28.5 (646)       | 11.0 (637)       |
| <b>Difference between worst-off and best-off patients, pp (95% CI)</b> | 11.6 (5.6;17.7) | 13.3 (8.0;18.5) | 15.4 (10.2;20.7) | 22.3 (17.0;27.6) | 20.2 (14.8;25.6) | 27.3 (22.0;32.6) | 20.9 (15.5;26.3) | 25.9 (20.3;31.6) | 28.2 (23.0;33.3) | 23.1 (18.7;27.5) |
| <b>PROCESS PERFORMANCE MEASURES, INDIVIDUALLY</b>                      |                 |                 |                  |                  |                  |                  |                  |                  |                  |                  |
| <b>Pain assessment, % (n)</b>                                          |                 |                 |                  |                  |                  |                  |                  |                  |                  |                  |
| Best-off patients                                                      | 84.5 (446)      | 85.4 (554)      | 89.1 (550)       | 82.1 (468)       | 86.8 (507)       | 93.6 (467)       | 91.9 (521)       | 90.4 (488)       | N/A              | N/A              |
| Worst-off patients                                                     | 72.5 (415)      | 81.0 (478)      | 78.5 (381)       | 56.5 (473)       | 75.1 (469)       | 75.2 (459)       | 73.5 (457)       | 61.5 (390)       | N/A              | N/A              |
| <b>Difference between worst-off and best-off patients, pp (95% CI)</b> | 12.0 (6.5;17.5) | 4.4 (-0.2;9.0)  | 10.6 (5.7;15.5)  | 25.6 (19.9;31.3) | 11.7 (6.8;16.6)  | 18.4 (13.9;23.0) | 18.4 (13.7;23.1) | 28.8 (23.3;34.3) | N/A              | N/A              |
| <b>Mobilization within 24 hours postoperative, % (n)</b>               |                 |                 |                  |                  |                  |                  |                  |                  |                  |                  |
| Best-off patients                                                      | N/A             | N/A             | N/A              | 78.7 (536)       | 85.0 (608)       | 84.7 (596)       | 89.4 (604)       | 88.9 (539)       | N/A              | 80.9 (613)       |
| Worst-off patients                                                     | N/A             | N/A             | N/A              | 52.8 (536)       | 68.8 (606)       | 73.5 (592)       | 78.3 (572)       | 67.9 (529)       | N/A              | 54.4 (559)       |
| <b>Difference between worst-off and best-off patients, pp (95% CI)</b> | N/A             | N/A             | N/A              | 25.9 (20.5;31.4) | 16.2 (11.6;20.9) | 11.3 (6.7;15.8)  | 11.1 (6.9;15.3)  | 21.0 (16.2;25.8) | N/A              | 26.5 (21.4;31.7) |
| <b>Fall prevention, % (n)</b>                                          |                 |                 |                  |                  |                  |                  |                  |                  |                  |                  |
| Best-off patients                                                      | N/A             | N/A             | N/A              | 74.2 (546)       | 88.3 (633)       | 94.8 (616)       | 91.7 (617)       | 89.9 (555)       | 89.8 (628)       | 93.4 (623)       |
| Worst-off patients                                                     | N/A             | N/A             | N/A              | 56.6 (546)       | 80.9 (633)       | 75.2 (616)       | 83.6 (617)       | 72.8 (555)       | 69.1 (598)       | 63.2 (592)       |
| <b>Difference between worst-off and best-off patients, pp (95% CI)</b> | N/A             | N/A             | N/A              | 17.6 (12.0;23.1) | 7.4 (3.5;11.4)   | 19.6 (15.8;23.5) | 8.1 (4.5;11.7)   | 17.1 (12.6;21.6) | 20.7 (16.3;25.1) | 30.2 (25.9;34.6) |

|                                                                        |                |                |                 |                  |                 |                  |                 |                  |                  |                  |
|------------------------------------------------------------------------|----------------|----------------|-----------------|------------------|-----------------|------------------|-----------------|------------------|------------------|------------------|
| <b>Assessment of need of anti-osteoporotic medication, % (n)</b>       |                |                |                 |                  |                 |                  |                 |                  |                  |                  |
| Best-off patients                                                      | N/A            | N/A            | N/A             | 89.2 (546)       | 93.4 (633)      | 95.6 (616)       | 95.5 (617)      | 93.5 (555)       | 91.2 (628)       | 95.4 (623)       |
| Worst-off patients                                                     | N/A            | N/A            | N/A             | 63.7 (546)       | 86.1 (633)      | 81.5 (616)       | 88.3 (617)      | 76.8 (555)       | 73.1 (598)       | 64.9 (592)       |
| <b>Difference between worst-off and best-off patients, pp (95% CI)</b> | N/A            | N/A            | N/A             | 25.5 (20.7;30.3) | 7.3 (3.9;10.6)  | 14.1 (10.7;17.6) | 7.1 (4.1;10.2)  | 16.8 (12.7;20.8) | 18.2 (14.0;22.4) | 30.5 (26.3;34.7) |
| <b>Assessment of nutrition risk, % (n)</b>                             |                |                |                 |                  |                 |                  |                 |                  |                  |                  |
| Best-off patients                                                      | 89.0 (507)     | 89.7 (648)     | 91.1 (627)      | N/A              | N/A             | N/A              | N/A             | N/A              | 84.7 (646)       | 94.0 (637)       |
| Worst-off patients                                                     | 79.3 (506)     | 81.0 (647)     | 81.0 (627)      | N/A              | N/A             | N/A              | N/A             | N/A              | 62.1 (646)       | 55.1 (637)       |
| <b>Difference between worst-off and best-off patients, pp (95% CI)</b> | 9.7 (5.2;14.2) | 8.7 (4.8;12.5) | 10.0 (6.2;13.8) | N/A              | N/A             | N/A              | N/A             | N/A              | 22.6 (17.9;27.3) | 38.9 (34.7;43.2) |
| <b>Post-discharge rehabilitation, % (n)</b>                            |                |                |                 |                  |                 |                  |                 |                  |                  |                  |
| Best-off patients                                                      | 90.3 (412)     | 94.8 (580)     | 96.5 (572)      | 94.0 (519)       | 96.2 (605)      | 98.5 (592)       | 97.5 (605)      | 95.9 (538)       | N/A              | 97.2 (613)       |
| Worst-off patients                                                     | 83.3 (414)     | 92.3 (533)     | 95.5 (551)      | 92.4 (489)       | 92.7 (605)      | 94.6 (594)       | 97.1 (595)      | 95.0 (524)       | N/A              | 91.7 (579)       |
| <b>Difference between worst-off and best-off patients, pp (95% CI)</b> | 7.0 (2.4;11.6) | 2.5 (-0.4;5.4) | 1.0 (-1.3;3.3)  | 1.6 (-1.5;4.7)   | 3.5 (0.9;6.0)   | 3.9 (1.8;5.9)    | 0.4 (-1.4;2.2)  | 0.9 (-1.6;3.4)   | N/A              | 5.5 (2.9;8.1)    |
| <b>Assessment of functional level at admission, % (n)</b>              |                |                |                 |                  |                 |                  |                 |                  |                  |                  |
| Best-off patients                                                      | 88.5 (504)     | 90.4 (646)     | 90.3 (627)      | N/A              | N/A             | N/A              | 85.4 (404)      | 85.6 (555)       | 95.4 (646)       | 94.2 (637)       |
| Worst-off patients                                                     | 81.3 (507)     | 81.7 (646)     | 83.6 (628)      | N/A              | N/A             | N/A              | 76.8 (426)      | 64.3 (555)       | 79.7 (646)       | 83.1 (637)       |
| <b>Difference between worst-off and best-off patients, pp (95% CI)</b> | 7.2 (2.8;11.6) | 8.7 (4.9;12.4) | 6.7 (3.0;10.4)  | N/A              | N/A             | N/A              | 8.6 (3.3;13.9)  | 21.3 (16.3;26.2) | 15.6 (12.1;19.1) | 11.1 (7.7;14.6)  |
| <b>Assessment of functional level at discharge, % (n)</b>              |                |                |                 |                  |                 |                  |                 |                  |                  |                  |
| Best-off patients                                                      | 84.7 (503)     | 86.7 (645)     | 86.1 (627)      | 72.5 (546)       | 79.3 (633)      | 88.5 (616)       | 90.3 (617)      | 86.9 (555)       | 94.6 (628)       | 96.0 (623)       |
| Worst-off patients                                                     | 76.5 (506)     | 77.0 (642)     | 76.6 (628)      | 45.1 (546)       | 66.5 (633)      | 70.5 (616)       | 78.3 (617)      | 79.6 (555)       | 80.3 (598)       | 82.6 (592)       |
| <b>Difference between worst-off and best-off patients, pp (95% CI)</b> | 8.2 (3.4;13.1) | 9.7 (5.5;13.9) | 9.5 (5.3;13.8)  | 27.5 (21.9;33.1) | 12.8 (7.9;17.6) | 18.0 (13.6;22.4) | 12.0 (8.0;16.0) | 7.2 (2.8;11.6)   | 14.3 (10.7;18.0) | 13.4 (10.0;16.8) |
| <b>Prevention of osteoporotic fractures, % (n)</b>                     |                |                |                 |                  |                 |                  |                 |                  |                  |                  |
| Best-off patients                                                      | 86.6 (447)     | 92.0 (577)     | 96.4 (575)      | N/A              | N/A             | N/A              | N/A             | N/A              | N/A              | N/A              |
| Worst-off patients                                                     | 81.8 (445)     | 85.8 (565)     | 89.0 (545)      | N/A              | N/A             | N/A              | N/A             | N/A              | N/A              | N/A              |
| <b>Difference between worst-off and best-off patients, pp (95% CI)</b> | 4.8 (0.0;9.6)  | 6.2 (2.6;9.8)  | 7.4 (4.3;10.4)  | N/A              | N/A             | N/A              | N/A             | N/A              | N/A              | N/A              |
| <b>Time to surgery ≤ 24 hours, % (n)</b>                               |                |                |                 |                  |                 |                  |                 |                  |                  |                  |
| Best-off patients                                                      | N/A            | N/A            | N/A             | N/A              | N/A             | N/A              | N/A             | N/A              | 74.2 (646)       | 76.3 (637)       |
| Worst-off patients                                                     | N/A            | N/A            | N/A             | N/A              | N/A             | N/A              | N/A             | N/A              | 61.2 (646)       | 62.8 (637)       |

|                                                                        |     |     |     |     |     |     |     |     |                    |                     |
|------------------------------------------------------------------------|-----|-----|-----|-----|-----|-----|-----|-----|--------------------|---------------------|
| <b>Difference between worst-off and best-off patients, pp (95% CI)</b> | N/A | 13.0<br>(7.9;18.1) | 13.5<br>(8.5;18.5)  |
| <b>Time to surgery ≤ 36 hours, % (n)</b>                               |     |     |     |     |     |     |     |     |                    |                     |
| Best-off patients                                                      | N/A | 87.0 (646)         | 89.8 (637)          |
| Worst-off patients                                                     | N/A | 80.7 (646)         | 79.1 (637)          |
| <b>Difference between worst-off and best-off patients, pp (95% CI)</b> | N/A | 6.3<br>(2.3;10.4)  | 10.7<br>(6.7;14.6)  |
| <b>Preoperative optimization, % (n)</b>                                |     |     |     |     |     |     |     |     |                    |                     |
| Best-off patients                                                      | N/A                | 58.7 (637)          |
| Worst-off patients                                                     | N/A                | 29.2 (637)          |
| <b>Difference between worst-off and best-off patients, pp (95% CI)</b> | N/A                | 29.5<br>(24.3;34.7) |



**SUPPLEMENTAL, FIGURE 1 | The proportion of best-off- and worst-off patients, who fulfilled the all-or-none score by calendar year excluding patients with missing information on education and fracture type**

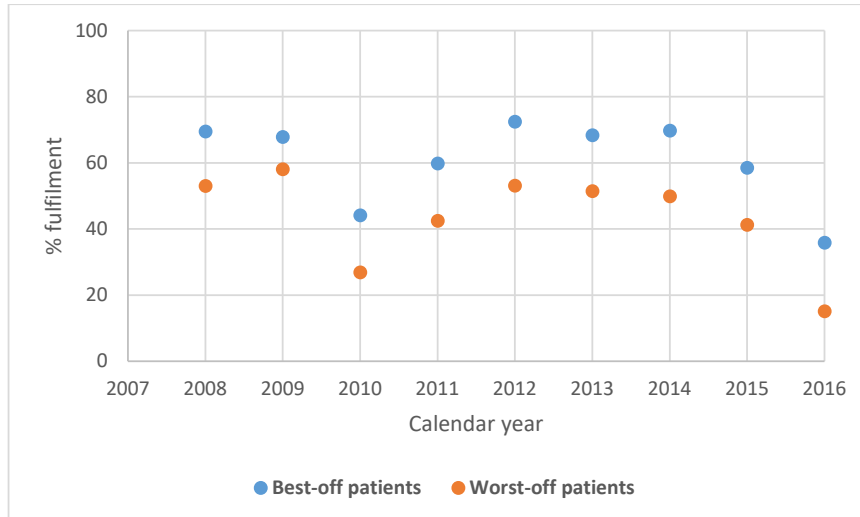

**SUPPLEMENTAL FIGURE 2 | Calibration curves, c-index and histogram of the distribution of predicted all-or-none for the prediction model by calendar year.**

- Histogram of the distribution of predicted all-or-none
- Identity line
- Calibration curve

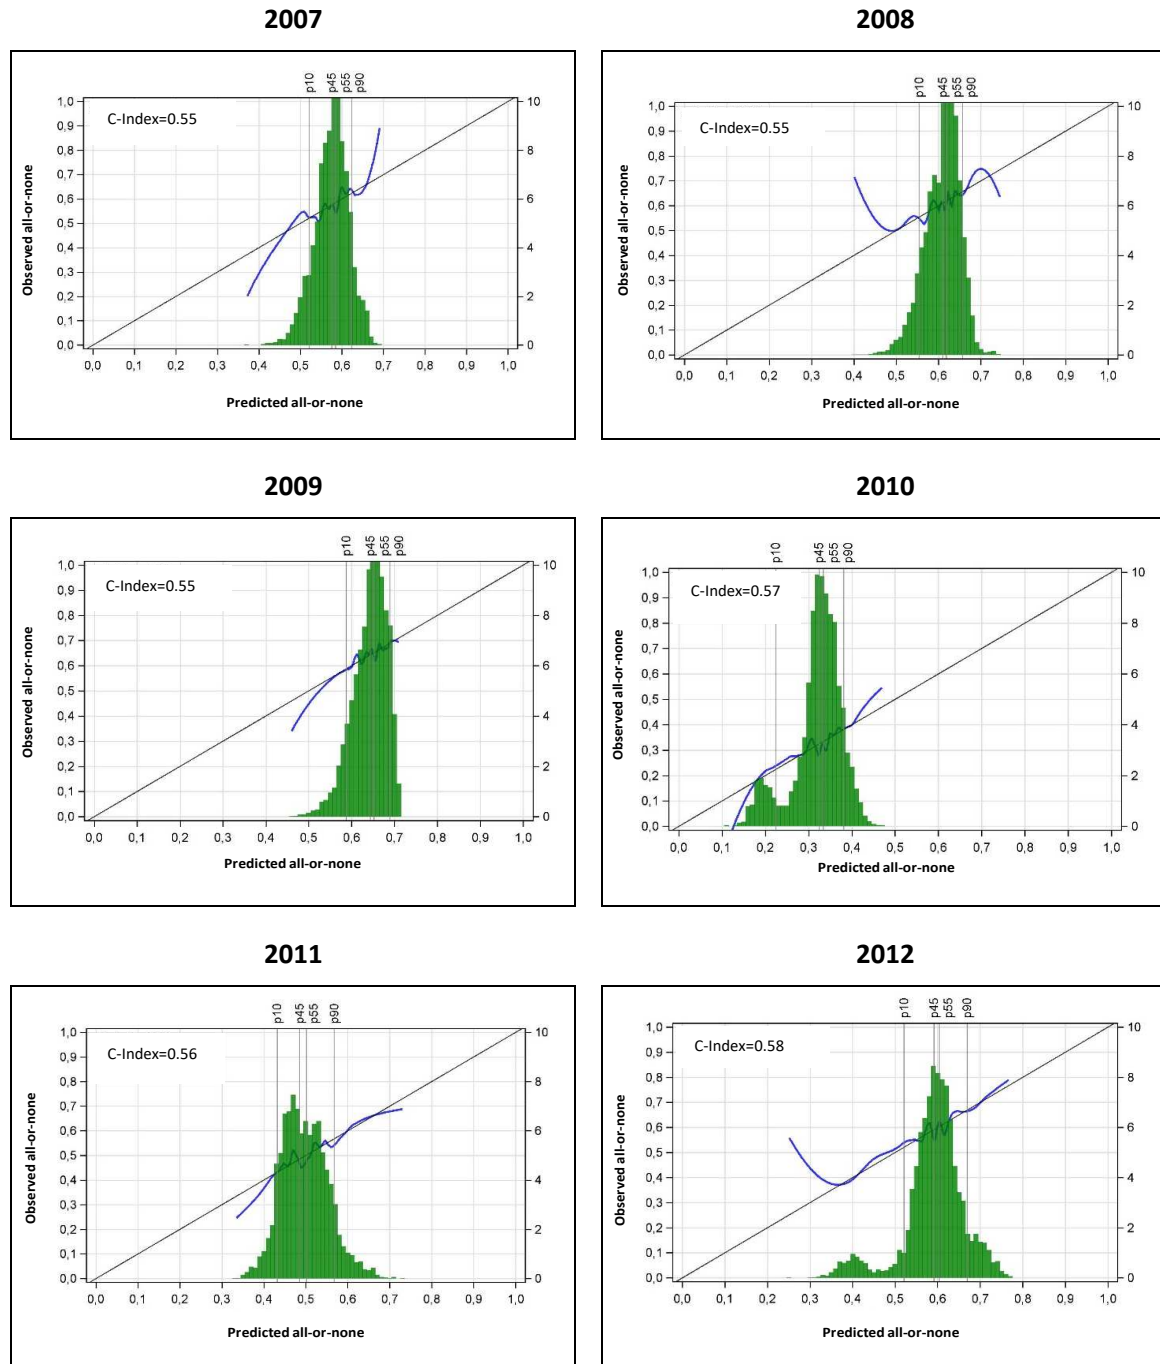

2013

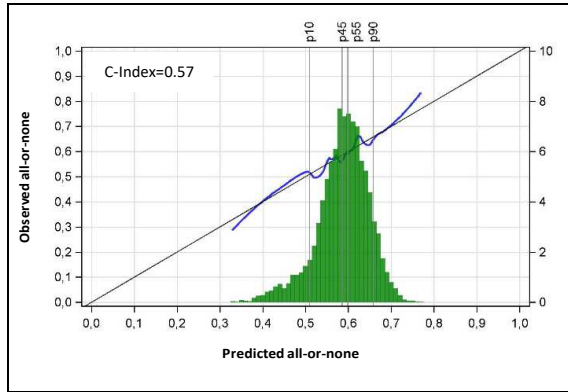

2014

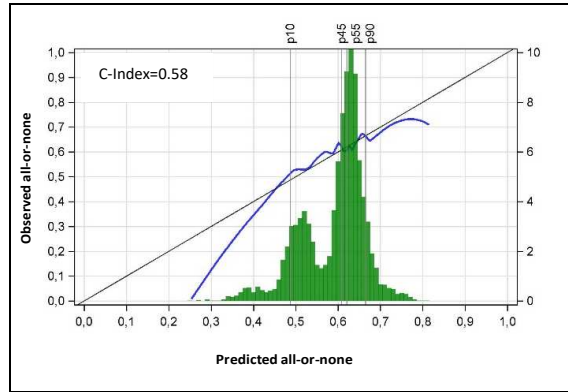

2015

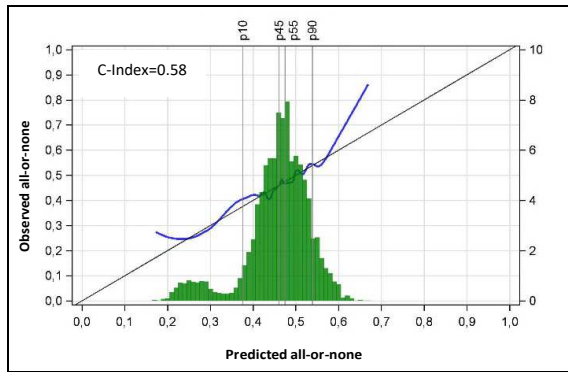

2016

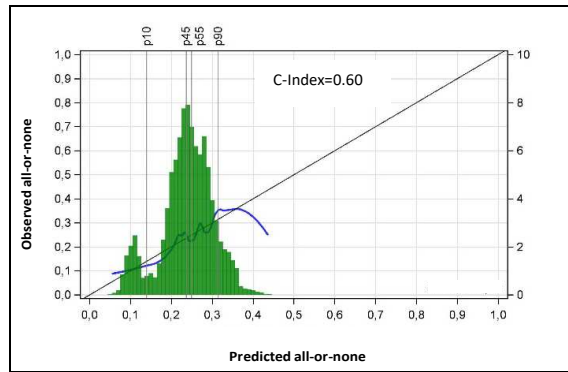

Supplement: inline-supplementary-material-1 [file inline-supplementary-material-1.pdf]
